# Supplementary material
Source: ML conference proceedings conference paper supplement (https://openaccess.thecvf.com/content/WACV2021/html/Jafarzadeh_Automatic_Open-World_Reliability_WACV_2021_paper.html)
Supplement: Supplementary file 1 [file Jafarzadeh_Automatic_Open-World_Reliability_WACV_2021_supplemental.pdf]

## Supplemental Material

In the supplemental material we also present a plot that combines on-time and total-detection rates. We also present plots obtained when we optimize to total-accuracy rather than on-time performance. Finally, we present pseudo-code for all algorithms considered in the paper.

### Bivariate KL fusion

If

$$p(x) \sim \mathcal{N}\left(\begin{bmatrix} \mu_1 \\ \mu_2 \end{bmatrix}, \begin{bmatrix} \sigma_1^2 & \rho\sigma_1\sigma_2 \\ \rho\sigma_1\sigma_2 & \sigma_2^2 \end{bmatrix}\right), \quad (21)$$

$$q(x) \sim \mathcal{N}\left(\begin{bmatrix} m_1 \\ m_2 \end{bmatrix}, \begin{bmatrix} s_1^2 & rs_1s_2 \\ rs_1s_2 & s_2^2 \end{bmatrix}\right) \quad (22)$$

Then, (9) can be written as

$$\begin{aligned} \text{KL}(P\|Q) = & \log\left(\frac{s_1s_2\sqrt{1-r^2}}{\sigma_1\sigma_2\sqrt{1-\rho^2}}\right) + \frac{1}{2(1-r^2)}\left( \right. \\ & \frac{(\mu_1 - m_1)^2 + (\sigma_1 - s_1)^2}{s_1^2} + \frac{(\mu_2 - m_2)^2 + (\sigma_2 - s_2)^2}{s_2^2} \\ & \left. - 2r\frac{(\mu_1 - m_1)(\mu_2 - m_2) + \rho\sigma_1\sigma_2 - rs_1s_2}{s_1s_2} \right) \quad (23) \end{aligned}$$

### Plots

To facilitate overall comparison We can consider a combined reliability score defined as *on\_time\_rate* \* *total\_detection\_rate*. Fig. 5 demonstrate the score of proposed algorithms when each point has a different threshold to compare the best performance of each algorithm in different percentage of unknown. The score is computed as the maximum multiplication of on-times and total detected ratio over all possible thresholds. We can see that the algorithm performs well for distributions of either EVM data or SoftMax value for decisions.

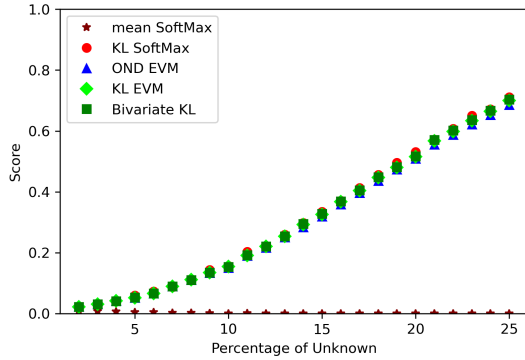

**Fig 5:** Reliability Score of proposed algorithms when the best threshold for each point is selected.

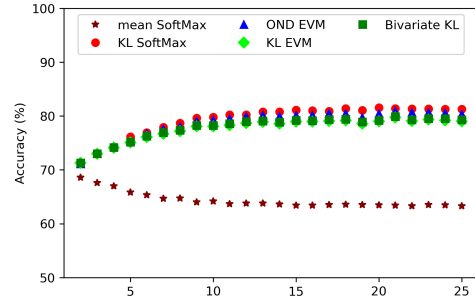

**(a) Total Accuracy**

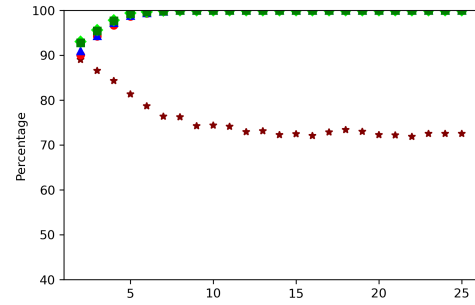

**(b) Total Detection Percentage**

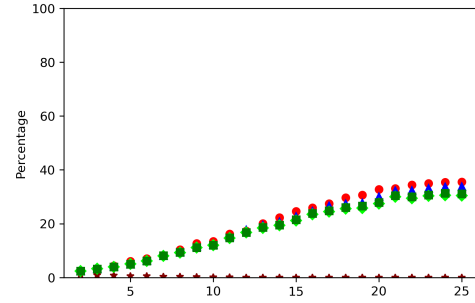

**(c) Percentage of on-time**

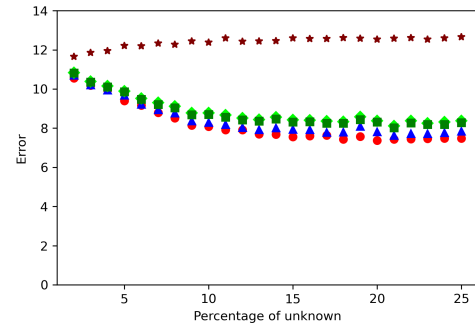

**(d) Mean Absolute Error**

**Fig 6:** Performance of proposed policies when the threshold is selected to maximize the total accuracy validation test with 2% unknown. Compare with Fig 2 in main paper.

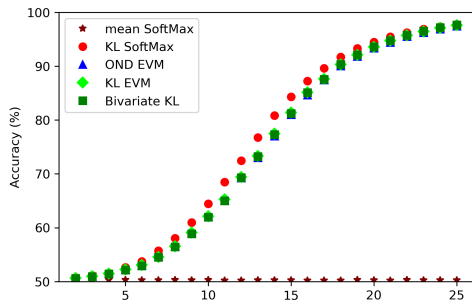

(a) Total Accuracy

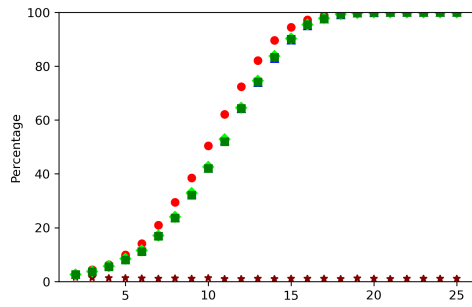

(b) Total Detection Percentage

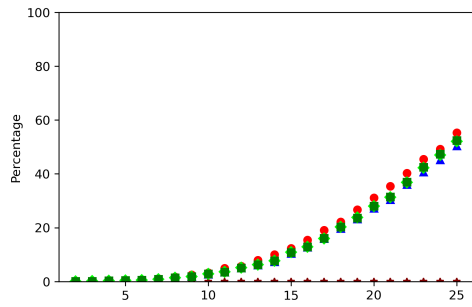

(c) Percentage of on-time

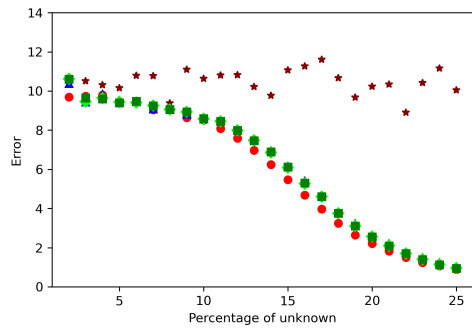

(d) Mean Absolute Error

**Fig 7:** Performance of proposed policies when the threshold is selected to have less than 1% early detection on validation test with 2% unknown. Compare with Fig 2 in main paper.

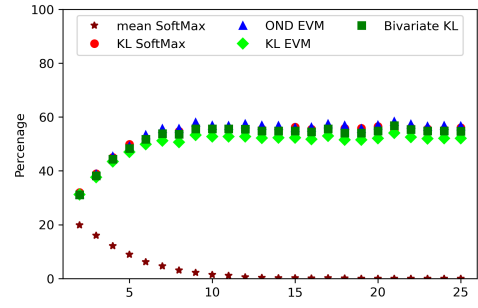

(a)

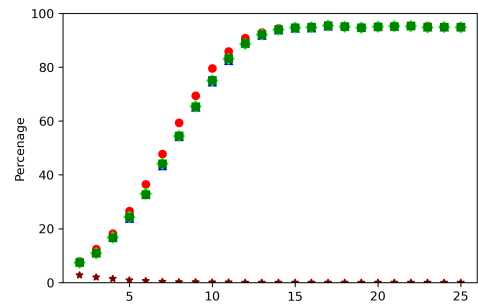

(b)

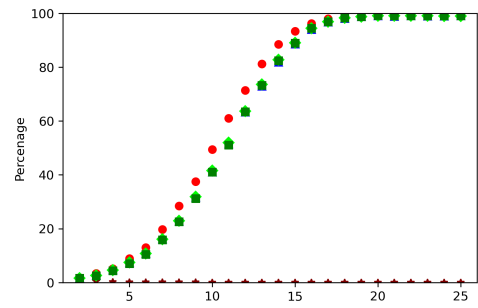

(c)

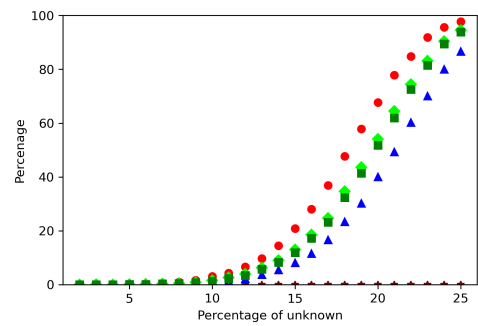

(d)

**Fig 8:** True detection percentage of proposed policies when the threshold is selected to (a) maximize true detection, (b) have 5% early detection, (c) have 1% early detection, (d) have not early detection on validation test with 2% unknown.

---

**Algorithm 1:** Simplest (baseline) automatic reliability assessment of open-set image classifiers using mean of SoftMax

---

**Input:** A batch of images,  $\mu_{old}$  state from past epoch (init 1.0)

**Config:**  $M$  tolerance to say image classifier is unreliable

**Output:** Reliability,  $\mu$  state

```
// N: number of images in the batch
x ← normalize each images to range [-1, +1]
s ← CNN(x) // SoftMax, N x M
p ← max (s) // Max over row, N x 1
μ ← mean (p)
μ ← min{μold, μ}
if μ > M then
  return (Reliable , μ)
else
  return (Unreliable , μ)
```

---

**Algorithm 2:** Information theory method for automatic reliability assessment of open-set image classifiers using Kullback–Leibler divergence of SoftMax

---

**Input:** A batch of images,  $D_{old}$  state from past epoch (init 0.0)

**Config:** (m,s) mean and standard deviation of SoftMax of training data set,  $\kappa$  tolerance to say image classifier is unreliable

**Output:** Reliability, D state

```
// N: number of images in the batch
x ← normalize each images to range [-1, +1]
s ← CNN(x) // SoftMax, N x M
p ← max (s) // Max over row, N x 1
μ ← mean (p)
σ ← std (p)
D ← KL(μ, σ, m, s) // Equation 10
D ← max{Dold, D}
if D < κ then
  return (Reliable , D)
else
  return (Unreliable , D)
```

---



---

**Algorithm 3:** Proposed OND automatic reliability assessment using EVM open-set image classifier

---

**Input:** A batch of images,  $\varepsilon_{old}$  state from past epoch (init 0)

**Config:**  $\Delta$  lower bound limit of probability of EVM for image to be considered as known classes,  $\hat{\rho}$  estimation of OOD class ratio,  $\Xi$  tolerance to say image classifier is unreliable

**Output:** Reliability,  $\varepsilon$  state

```
// N: number of images in the batch
// M: feature size of CNN
// L: number of known classes
x ← normalize each images to range [-1, +1]
f ← CNN(x) // Deep features, N x M
P ← EVM(f) // Equation 4, N x L
p ← max (P) // Max over row, N x 1
v ← 1 - Δ - p // N x 1
ν ← max{0, v} // element wise maximum
μ ← mean (ν)
ζ ← μ - ρ̂(1 - Δ)
η ← max{0, ζ}
ε ← max{εold, η}
if ε < Ξ then
  return (Reliable , ε)
else
  return (Unreliable , ε)
```

---

---

**Algorithm 4:** Proposed automatic reliability assessment of open-set image classifiers using Kullback–Leibler divergence of EVM

---

**Input:** A batch of images,  $D_{old}$  state from past epoch (init 0.0)

**Config:** (m,s) mean and standard deviation of maximum class probability of EVM on training data set,  $\kappa$  tolerance to say image classifier is unreliable

**Output:** Reliability, D state

```
// N: number of images in the batch
// M: feature size of CNN
// L: number of known classes
x ← normalize each images to range [-1, +1]
f ← CNN(x) // Deep features, N x M
P ← EVM(f) // Equation 4, N x L
p ← max (P) // Max over row, N x 1
μ ← mean (p)
σ ← std (p)
D ← KL(μ, σ, m, s) // Equation 10
D ← max{Dold, D}
if D < κ then
  return (Reliable, D)
else
  return (Unreliable, D)
```

---



---

**Algorithm 5:** Proposed automatic reliability assessment of open-set image classifiers using bivariate Kullback–Leibler divergence of SoftMax and EVM

---

**Input:** A batch of images,  $D_{old}$  state from past epoch (init 0.0)

**Config:** ( $m_1, m_2, s_1, s_2$ ) mean and standard deviation of maximum SoftMax and maximum class probability of EVM on training data set,  $\kappa$  tolerance to say image classifier is unreliable

**Output:** Reliability, D state

```
// N: number of images in the batch
// M: feature size of CNN
// L: number of known classes
x ← normalize each images to range [-1, +1]
f, s ← CNN(x) // Deep features and SoftMax
P ← EVM(f) // Equation 4, N x L
p1 ← max (s) // Max over row, N x 1
p2 ← max (P) // Max over row, N x 1
μ1 ← mean (p1)
μ2 ← mean (p2)
σ1 ← std (p1)
σ2 ← std (p2)
ρ ← correlation (p1, p2)
// KL from equation 23
D ← KL(μ1, μ2, σ1, σ2, ρ, m1, m2, s1, s2, r)
D ← max{Dold, D}
if D < κ then
  return (Reliable, D)
else
  return (Unreliable, D)
```

---
